# Supplementary material
Source: PubMed Central journal article supplement (PMC2258229)
Supplement: NIHMS39819-supplement-supplement_1.pdf [file NIHMS39819-supplement-supplement_1.pdf]

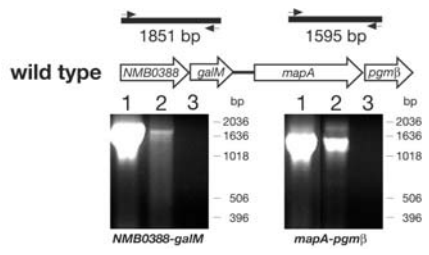

Fig. 1S

|           |                                             |
|-----------|---------------------------------------------|
| NMB0363   | cAacTaTAgTgGATTAACaAAtcaggacaagg            |
| NMB0387   | gcaaTa AgTgGATTAACaAAtcaggacaagg            |
| NMB0577   | aAcgTgTACCTgGtTTAAAtTAA tccACTAtaTT         |
| NMB1677   | TATaTTTggTgtgTTAAccAgttaACaAtaTT            |
| NMB0389   | TcgcTTgtCTGATTTttgTAA tccACTAtaag           |
| NMB0363   | ctatTTTgtTTGtTTTAtATgtA agtatAcgTa          |
| NMB1623   | TtTaTaTAgTgGATTA AAA TcAcaaAatAtgaa         |
| NMB1623   | TATgaTTAtTTGAcTTAAA cAAAaTgCCcccaa          |
| NMB0577   | atTtTaaAtTTGATTTgcAcAAA aaAtCgcccga         |
| NMB1677   | agacgTcttTTGAcTTActcAAA cTcTTATTTc          |
| NMB1806   | accaTgTgtTTcAcATAAA ccAA ccgC atatTT        |
| NMB1869   | acTgcaTcgTTaATAATAAA TcAA tgAgCtgtTT        |
| NMB0389   | TcacaTTcCCcTcaaatcAA ccAA acAggAgcTT        |
| NMB1805   | TATtTaTAC TaaATTTAcATAAA tTACCActgT         |
| NMB1677   | gccaTTTgCagaATTTAcgTAA ccTtgCgttTT          |
| NMB1869   | aAccaTTcCCacAccTAAATAA caTtagAaaca          |
| Consensus | TATNC <u>TTTACTTGATTTAAATTAA</u> AMTACCAHWT |

Fig. 2S

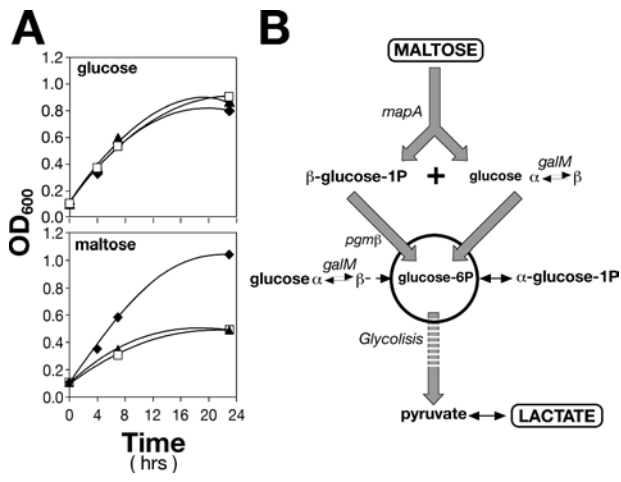

Fig. 3S

**A**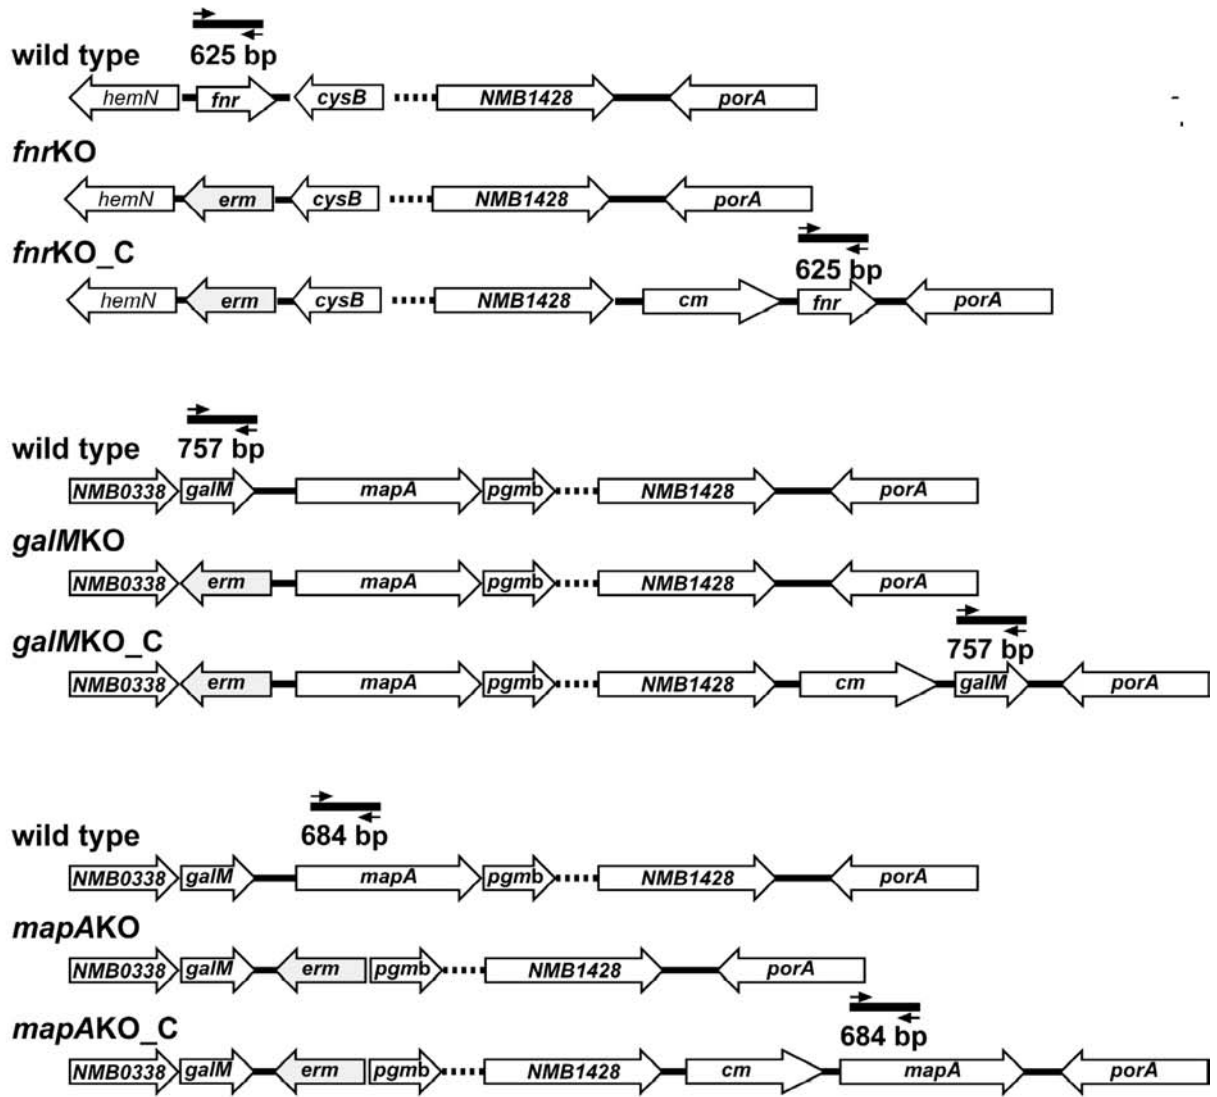**B**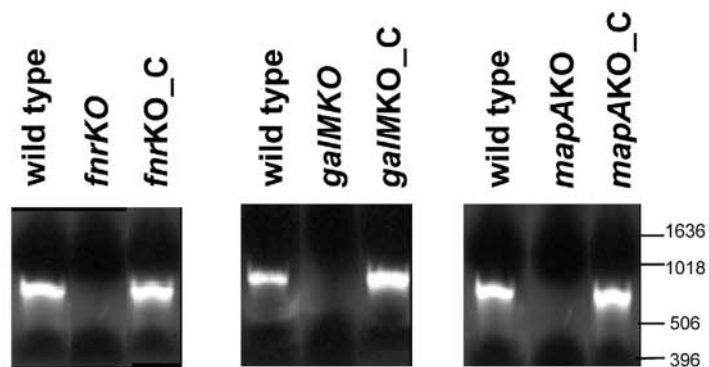

Fig. 4S

**Table 2S. FNR binding to the upstream regions of the 9 FNR-regulated transcriptional units**

| Transcriptional unit <sup>a</sup> | EMSA-tested upstream region <sup>b</sup> | EMSA <sup>c</sup> |             |
|-----------------------------------|------------------------------------------|-------------------|-------------|
|                                   |                                          | Ec FNR (nM)       | Nm FNR (nM) |
| NMB0808                           | -250/+20                                 | >800              | >800        |
| <b><i>aniA</i></b>                | -400/+20                                 | 50                | 400         |
| <b>NMB0388-galM</b>               | -400/+20                                 | 50                | 400         |
| <b><i>mapA-pgmB</i></b>           | -250/+20                                 | >800              | 800         |
| <b>NMB0363 (hypothetical)</b>     | -250/+20                                 | >800              | 100         |
| <b>NMB1677 (cytochrome c5)</b>    | -350/+20                                 | 200               | 400         |
| <b>NMB1805 (cytochrome c4)</b>    | -200/+20                                 | >800              | 800         |
| <b>NMB1806 (hypothetical)</b>     | -200/+20                                 | >800              | 800         |
| <b><i>cbbA-NMB1870</i></b>        | -200/+20                                 | 800               | 800         |
| <b><i>nosR</i></b>                | -250/+20                                 | 100               | 800         |

FNR binding ability to the upstream regions was evaluated by Electrophoretic Mobility Shift Assay (EMSA) with increasing concentration of *E. coli* (Ec) and MenB (Nm) FNR proteins

<sup>a</sup> The genes found regulated in each transcriptional unit are indicated in bold. NMB0808 was used as a negative control.

<sup>b</sup> Numbers indicate the positions of primers used to amplify the DNA regions tested in EMSA with respect to the start codon (+1 position).

<sup>c</sup> Values indicate the lowest FNR dimer concentration at which binding was observed
